# Supplementary material for: Investigating the Sensitivity of Low-Cost Sensors in Measuring Particle Number Concentrations across Diverse Atmospheric Conditions in Greece and Spain
Source: MDPI journal article supplement (doi:10.3390/s23146541), 2023-07-20
Supplement: s1 [file s1]

### Supplementary Material

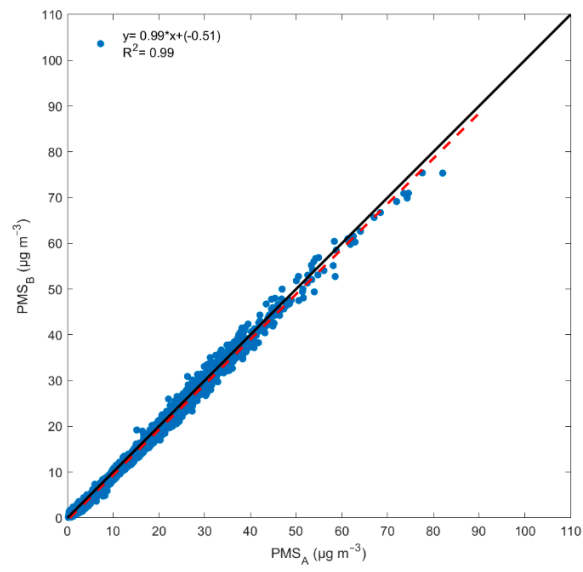

Figure S1. Scatterplot of PAir sensors A and B raw PM<sub>2.5</sub> measurements in PSA.

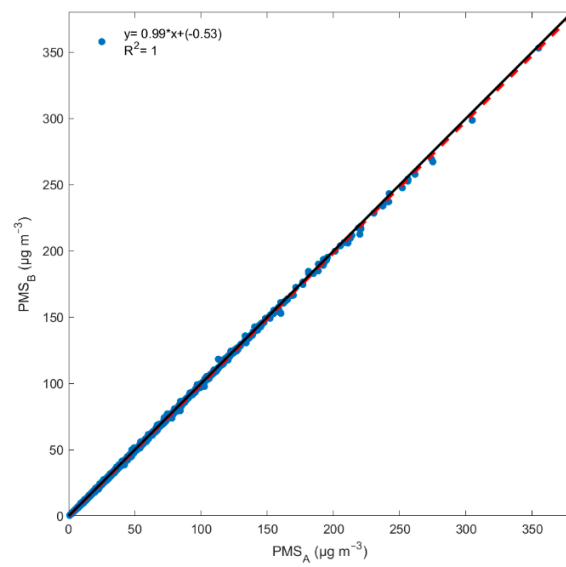

Figure S2. Scatterplot of PAir sensors A and B raw PM<sub>2.5</sub> measurements in Germanou.

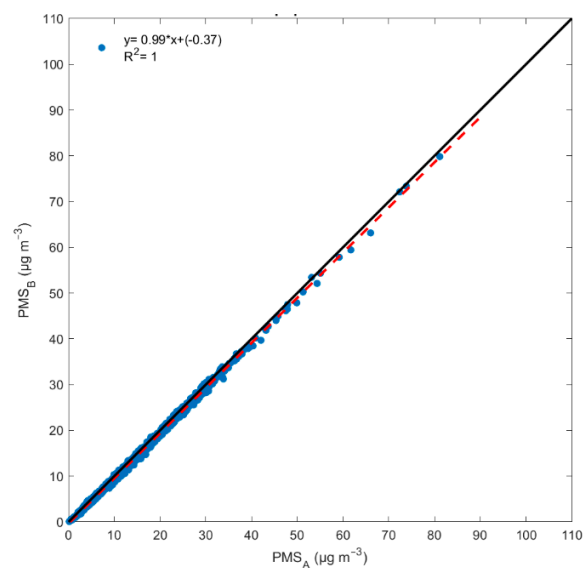

Figure S3. Scatterplot of PAir sensors A and B raw PM<sub>2.5</sub> measurements in UPat.

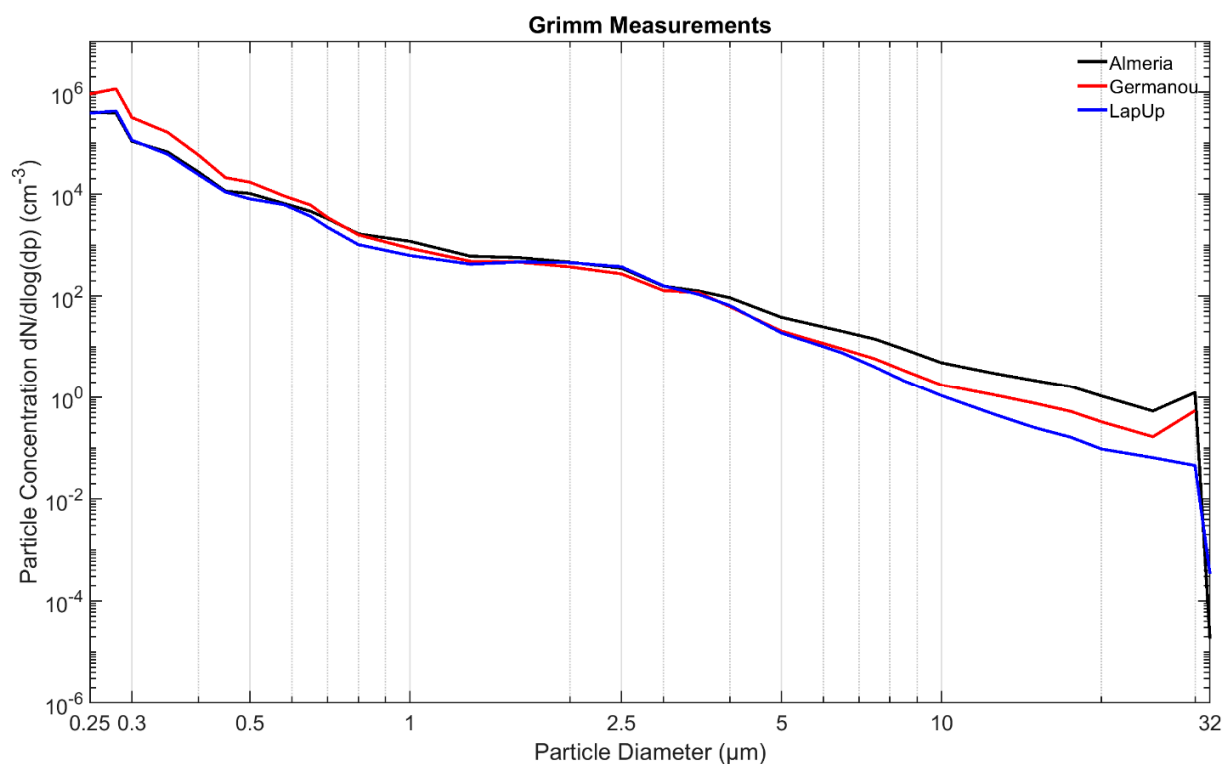

Figure S4. Average Particle Size Distribution based on Grimm measurements in Almeria, Germanou and UPat.
